# Supplementary material for: A Phase 1, Open-Label Study to Evaluate the Effects of Food and Evening Dosing on the Pharmacokinetics of Oral Trofinetide in Healthy Adult Subjects
Source: PubMed Central journal article supplement — Clin Drug Investig. 2022 May 27;42(6):513–24. doi: 10.1007/s40261-022-01156-4 (PMC9188616; doi:10.1007/s40261-022-01156-4), 2022-05-27
Supplement: 40261_2022_1156_MOESM1_ESM.pdf [file 40261_2022_1156_MOESM1_ESM.pdf]

## Supplementary material

Journal: Clinical Drug Investigation

### A Phase 1, Open-Label Study to Evaluate the Effects of Food and Evening Dosing on the Pharmacokinetics of Oral Trofinetide in Healthy Adult Subjects

Mona Darwish • James M. Youakim • Jim Harlick • Daryl DeKarske • Serge Stankovic

Mona Darwish, Acadia Pharmaceuticals Inc., 12830 El Camino Real, Suite 400, San Diego, CA, USA 92130

Email: mdarwish@acadia-pharm.com

## Online Resource 1

### Bioanalysis and Pharmacokinetic Assessment

Human urine and lithium heparinized blood samples were analyzed for concentrations of trofinetide by Inotiv (West Lafayette, Indiana, United States) using validated liquid chromatographic–tandem mass spectrometric bioanalytical methods.

Sample processing for blood was performed by solid phase extraction of a 50- $\mu$ L volume at alkaline pH using an Oasis<sup>®</sup> MAX solid phase extraction plate (Waters Corp., Milford, Massachusetts, United States). High-performance liquid chromatography (HPLC) was performed using a Restek<sup>™</sup> Ultra PFPP column (100  $\times$  3.0 mm, 3  $\mu$ m) (Bellefonte, Pennsylvania, United States) and analyzed using a Sciex API 4000 mass spectrometer with Turbolonspray ionization source in positive ion mode and Analyst<sup>™</sup> control software versions 1.5.2 and 1.7.1. Mass spectrometric detection was done using multiple reaction monitoring (MRM) with transitions (m/z) 316.2 $\rightarrow$ 169.1 for trofinetide and 322.2 $\rightarrow$ 169.0 for the internal standard [<sup>13</sup>C<sub>5</sub>,<sup>15</sup>N]-trofinetide. The assay range was 0.100–100  $\mu$ g/mL for trofinetide.

Sample processing for urine was performed by solid phase extraction of a 20- $\mu$ L volume at alkaline pH using an Oasis<sup>®</sup> MAX solid phase extraction plate (Waters Corp., Milford, Massachusetts, United States). High-performance liquid chromatography (HPLC) was performed

using a Restek™ Ultra PFP propyl column (100 × 3.0 mm, 5 µm) (Bellefonte, Pennsylvania, United States) and analyzed using a Sciex API 4000 mass spectrometer with Turbolonspray ionization source in positive ion mode and Analyst™ control software version 1.7.1. Mass spectrometric detection was done using MRM with transitions (m/z) 316→169 for trofinetide and 322→169 for the internal standard [<sup>13</sup>C<sub>5</sub>,<sup>15</sup>N]-trofinetide. The assay range was 0.0500–50.0 mg/mL for trofinetide.

The precision (coefficient of variation [%CV]) and accuracy (relative error [RE%]/mean % difference [Bias%]) of both of the HPLC methods were acceptable for trofinetide (≤ 15% [≤ 20% at the lower limit of quantification]). Mean recoveries of trofinetide and its <sup>13</sup>C<sub>5</sub>, <sup>15</sup>N-labeled internal standard were 61.8% and 64.0%, respectively, from human whole blood and were 71.4% and 68.1%, respectively, from human urine. Validation and acceptance criteria were based on the FDA's Guidance for Industry: Bioanalytical Method Validation [1].

### Multiple reaction monitoring conditions

| Matrix      | Declustering potential | Collision energy | Cell exit potential |
|-------------|------------------------|------------------|---------------------|
| Whole Blood | 41.00                  | 19.00            | 4.00                |
| Urine       | 56.00                  | 19.00            | 10.00               |

### Reference

1. U.S. Department of Health and Human Services, Food and Drug Administration, Center for Drug Evaluation and Research (CDER), Center for Veterinary Medicine (CVM). Guidance for industry: bioanalytical method validation. May 2001. [https://www.moh.gov.bw/Publications/drug\\_regulation/Bioanalytical%20Method%20Validation%20FDA%202001.pdf](https://www.moh.gov.bw/Publications/drug_regulation/Bioanalytical%20Method%20Validation%20FDA%202001.pdf). Accessed October 2021.
